# Supplementary material for: Gestational diabetes and adverse perinatal outcomes from 716,152 births in France in 2012
Source: PubMed Central journal article supplement (PMC6518373; doi:10.1007/s00125-017-4206-6), 2017-02-15
Supplement: 125_2017_4206_MOESM1_ESM.pdf [file 125_2017_4206_MOESM1_ESM.pdf]

**Table 1 ESM:** Number and percentage of women who delivered after 22 weeks (including terminations of pregnancy after 22 weeks) for each age-group by diabetes status

| Maternal age (years) | No diabetes | GDM    | T1D  | T2D  | Total   |
|----------------------|-------------|--------|------|------|---------|
| $\leq 19$            |             |        |      |      |         |
| <i>n</i>             | 19,480      | 450    | 30   | 10   | 19,970  |
| Rate, %              | 97.5        | 2.3    | 0.2  | 0.1  |         |
| 20-24                |             |        |      |      |         |
| <i>n</i>             | 110,487     | 4746   | 173  | 100  | 115,506 |
| Rate, %              | 95.7        | 4.1    | 0.1  | 0.1  |         |
| 25-29                |             |        |      |      |         |
| <i>n</i>             | 239,608     | 14,445 | 407  | 330  | 254,790 |
| Rate, %              | 94.0        | 5.7    | 0.2  | 0.1  |         |
| 30-34                |             |        |      |      |         |
| <i>n</i>             | 233,762     | 19,199 | 422  | 641  | 254,024 |
| Rate, %              | 92.0        | 7.6    | 0.2  | 0.3  |         |
| 35-39                |             |        |      |      |         |
| <i>n</i>             | 106,912     | 13,865 | 193  | 546  | 121,516 |
| Rate, %              | 88.0        | 11.4   | 0.2  | 0.4  |         |
| $\geq 40$            |             |        |      |      |         |
| <i>n</i>             | 25,270      | 4924   | 66   | 280  | 30,540  |
| Rate, %              | 82.7        | 16.1   | 0.2  | 0.9  |         |
| Total                | 735,519     | 57,629 | 1291 | 1907 | 796,346 |

T1D, type 1 diabetes; T2D, type 2 diabetes

**Table 2 ESM:** Maternal and neonatal outcomes among deliveries of mothers excluded from the GDM group according to the restrictive criteria (see material and method section).

|                                            | Deliveries >28 weeks | Deliveries $\geq$ 37 weeks |
|--------------------------------------------|----------------------|----------------------------|
| Maternal                                   |                      |                            |
| <i>n</i>                                   | 1376                 | 1171                       |
| Caesarean section                          |                      |                            |
| Rate, %                                    | 38.88                | 36.38                      |
| Eclampsia/Preeclampsia                     |                      |                            |
| Rate, %                                    | 4.58                 | 2.65                       |
| Delivery <37 weeks                         |                      |                            |
| Rate, %                                    | 14.90                | NA                         |
| Treated by insulin during pregnancy        |                      |                            |
| Rate, %                                    | 78.78                | 79.16                      |
| Neonatal                                   |                      |                            |
| <i>n</i>                                   | 1221                 | 1036                       |
| Perinatal death <sup>a</sup>               |                      |                            |
| Rate, %                                    | 2.21                 | 1.25                       |
| Asphyxia                                   |                      |                            |
| Rate, %                                    | 1.56                 | 1.54                       |
| Macrosomia                                 |                      |                            |
| Rate, %                                    | 27.52                | 27.12                      |
| Erb's palsy/clavicle fracture <sup>b</sup> |                      |                            |
| Rate, %                                    | 0.92                 | 1.05                       |
| Cardiac malformations                      |                      |                            |
| Rate, %                                    | 2.29                 | 1.74                       |
| Nervous system malformations               |                      |                            |
| Rate, %                                    | 0.25                 | 0.19                       |
| Respiratory distress                       |                      |                            |
| Rate, %                                    | 6.39                 | 4.05                       |

<sup>a</sup> Calculated on deliveries excluding terminations of pregnancy after 22 weeks

<sup>b</sup> Calculated on deliveries excluding caesarean sections

NA: not applicable

**Table 3 ESM:** Risk for maternal and neonatal outcomes among deliveries after 28 weeks in the GDM group by diabetes treatment

| Outcome                                    | No diabetes | GDM             | Insulin-treated GDM | Non-insulin-treated GDM |
|--------------------------------------------|-------------|-----------------|---------------------|-------------------------|
| Maternal                                   |             |                 |                     |                         |
| <i>n</i>                                   | 729,105     | 56,007          | 15,024              | 40,983                  |
| Caesarean section                          |             |                 |                     |                         |
| Rate, %                                    | 19.5        | 27.5            | 33.5                | 25.3                    |
| OR (95% CI) <sup>a</sup>                   | 1           | 1.4 (1.3, 1.4)  | 1.7 (1.6, 1.8)      | 1.3 (1.2, 1.3)          |
| Eclampsia/preeclampsia                     |             |                 |                     |                         |
| Rate, %                                    | 1.5         | 2.5             | 2.3                 | 2.6                     |
| OR (95% CI) <sup>b</sup>                   | 1           | 1.6 (1.5, 1.7)  | 1.5 (1.3, 1.6)      | 1.7 (1.6, 1.8)          |
| Delivery <37 weeks                         |             |                 |                     |                         |
| Rate, %                                    | 6.1         | 7.9             | 8.8                 | 7.5                     |
| OR (95% CI) <sup>b</sup>                   | 1           | 1.3 (1.2, 1.3)  | 1.4 (1.4, 1.5)      | 1.2 (1.2, 1.3)          |
| Neonatal                                   |             |                 |                     |                         |
| <i>n</i>                                   | 655,534     | 51,058          | 13,825              | 37,233                  |
| Perinatal death <sup>c</sup>               |             |                 |                     |                         |
| Rate, %                                    | 0.32        | 0.31            | 0.24                | 0.34                    |
| OR (95% CI) <sup>b</sup>                   | 1           | 0.9 (0.8, 1.1)  | 0.7 (0.5, 1.0)      | 1.0 (0.9, 1.2)          |
| Asphyxia                                   |             |                 |                     |                         |
| Rate, %                                    | 0.8         | 1.0             | 0.9                 | 1.0                     |
| OR (95% CI) <sup>b</sup>                   | 1           | 1.2 (1.1, 1.3)  | 1.1 (0.9, 1.3)      | 1.2 (1.1, 1.4)          |
| Macrosomia                                 |             |                 |                     |                         |
| Rate, %                                    | 9.2         | 15.4            | 18.0                | 14.4                    |
| OR (95% CI) <sup>b</sup>                   | 1           | 1.7 (1.7, 1.8)  | 2.1 (2.0, 2.2)      | 1.6 (1.6, 1.7)          |
| Erb's palsy/clavicle fracture <sup>d</sup> |             |                 |                     |                         |
| Rate, %                                    | 0.5         | 0.7             | 0.7                 | 0.7                     |
| OR (95% CI) <sup>e</sup>                   | 1           | 1.3 (1.1, 1.5)  | 1.4 (1.1, 1.8)      | 1.2 (1.1, 1.4)          |
| Cardiac malformations                      |             |                 |                     |                         |
| Rate, %                                    | 0.62        | 0.76            | 0.96                | 0.69                    |
| OR (95% CI) <sup>b</sup>                   | 1           | 1.2 (1.1, 1.3)  | 1.5 (1.3, 1.8)      | 1.1 (1.0, 1.2)          |
| Nervous system malformations               |             |                 |                     |                         |
| Rate, %                                    | 0.12        | 0.11            | 0.08                | 0.12                    |
| OR (95% CI) <sup>b</sup>                   | 1           | 0.9 (0.7, 1.2)  | 0.7 (0.4, 1.2)      | 1.0 (0.6, 1.4)          |
| Respiratory distress                       |             |                 |                     |                         |
| Rate, %                                    | 2.7         | 3.3             | 3.3                 | 3.4                     |
| OR (95% CI) <sup>a</sup>                   | 1           | 1.1 (1.05, 1.2) | 1.0 (0.9, 1.1)      | 1.1 (1.1, 1.2)          |

Data excluded mothers to whom insulin or oral glucose-lowering agents were prescribed during the year after pregnancy.

<sup>a</sup> Adjusted for maternal age and gestational age

<sup>b</sup> Adjusted for maternal age

<sup>c</sup> Calculated on deliveries excluding terminations of pregnancy after 22 weeks

<sup>d</sup> Calculated on deliveries excluding caesarean sections

<sup>e</sup> Adjusted for maternal age and birthweight

**Table 4 ESM:** Risk for maternal and neonatal outcomes among deliveries after 37 weeks in the GDM group by diabetes treatment.

| Outcome                                    | No diabetes | GDM             | Insulin-treated GDM | Non-insulin-treated GDM |
|--------------------------------------------|-------------|-----------------|---------------------|-------------------------|
| <b>Maternal</b>                            |             |                 |                     |                         |
| <i>n</i>                                   | 684,398     | 51,609          | 13,706              | 37,903                  |
| Caesarean section                          |             |                 |                     |                         |
| Rate, %                                    | 18.3        | 26.0            | 32.2                | 23.8                    |
| OR (95% CI) <sup>a</sup>                   | 1           | 1.4 (1.4, 1.4)  | 1.8 (1.7, 1.8)      | 1.3 (1.2, 1.3)          |
| Eclampsia/ preeclampsia                    |             |                 |                     |                         |
| Rate, %                                    | 1.0         | 1.6             | 1.5                 | 1.7                     |
| OR (95% CI) <sup>b</sup>                   | 1           | 1.7 (1.6, 1.8)  | 1.5 (1.3, 1.8)      | 1.7 (1.6, 1.9)          |
| <b>Neonatal</b>                            |             |                 |                     |                         |
| <i>n</i>                                   | 614,853     | 46,923          | 12,586              | 34,337                  |
| Perinatal death <sup>c</sup>               |             |                 |                     |                         |
| Rate, %                                    | 0.15        | 0.19            | 0.15                | 0.20                    |
| OR (95% CI) <sup>b</sup>                   | 1           | 1.2(0.9, 1.5)   | 0.9 (0.6, 1.5)      | 1.3 (1.0, 1.6)          |
| Asphyxia                                   |             |                 |                     |                         |
| Rate, %                                    | 0.7         | 0.8             | 0.8                 | 0.8                     |
| OR (95% CI) <sup>b</sup>                   | 1           | 1.2 (1.05, 1.3) | 1.1 (0.9, 1.3)      | 1.2 (1.1, 1.3)          |
| Macrosomia                                 |             |                 |                     |                         |
| Rate, %                                    | 9.2         | 15.3            | 17.6                | 14.5                    |
| OR (95% CI) <sup>b</sup>                   | 1           | 1.7 (1.7, 1.8)  | 2.0 (1.9, 2.1)      | 1.6 (1.6, 1.7)          |
| Erb's palsy/clavicle fracture <sup>d</sup> |             |                 |                     |                         |
| Rate, %                                    | 0.5         | 0.7             | 0.7                 | 0.7                     |
| OR (95% CI) <sup>e</sup>                   | 1           | 1.3 (1.1, 1.4)  | 1.4 (1.1, 1.8)      | 1.2 (1.1, 1.4)          |
| Cardiac malformations                      |             |                 |                     |                         |
| Rate, %                                    | 0.50        | 0.65            | 0.90                | 0.56                    |
| OR (95% CI) <sup>b</sup>                   | 1           | 1.3 (1.1, 1.4)  | 1.7 (1.4, 2.1)      | 1.1 (1.0, 1.3)          |
| Nervous system malformations               |             |                 |                     |                         |
| Rate, %                                    | 0.08        | 0.08            | 0.07                | 0.08                    |
| OR (95% CI) <sup>b</sup>                   | 1           | 1.0 (0.7, 1.4)  | 1.0 (0.5, 1.8)      | 1.0 (0.7, 1.5)          |
| Respiratory distress                       |             |                 |                     |                         |
| Rate, %                                    | 1.6         | 2.0             | 2.1                 | 2.0                     |
| OR (95% CI) <sup>a</sup>                   | 1           | 1.2 (1.2, 1.3)  | 1.3 (1.1, 1.5)      | 1.2 (1.1, 1.3)          |

Data excluded mothers to whom insulin or oral glucose-lowering agents were prescribed during the year after pregnancy.

<sup>a</sup> Adjusted for maternal age and gestational age

<sup>b</sup> Adjusted for maternal age

<sup>c</sup> Calculated on deliveries excluding terminations of pregnancy after 22 weeks

<sup>d</sup> Calculated on deliveries excluding caesarean sections

<sup>e</sup> Adjusted for maternal age and birthweight
